## RESEARCH ARTICLE

# *Langbiangia*, a new genus of Gesneriaceae endemic to Langbiang Plateau, southern Vietnam and a taxonomic endeavor to achieve key targets of the post-2020 global biodiversity framework

Hong Truong Luu<sup>1</sup>, Chia-Lun Hsieh<sup>1,2</sup>, Chia-Rong Chuang<sup>2</sup>, Cheng-Wei Chen<sup>2,3,4</sup>, Ngoc Toan Tran<sup>1</sup>, Ngoc Long Vu<sup>1</sup>, Kuo-Fang Chung<sup>1,2\*</sup>

**1** Southern Institute of Ecology, Institute of Applied Materials Science & Graduate University of Science and Technology, Vietnam Academy of Science and Technology, Ho Chi Minh City, Vietnam, **2** Research Museum and Herbarium (HAST), Biodiversity Research Center, Academia Sinica, Taipei, Taiwan, **3** Biodiversity Program, Taiwan International Graduate Program, Academia Sinica, Taipei, Taiwan, **4** Department of Life Science, National Taiwan Normal University, Taipei, Taiwan

\* [bochung@gate.sinica.edu.tw](mailto:bochung@gate.sinica.edu.tw)

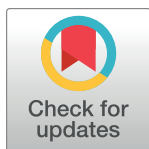

## OPEN ACCESS

**Citation:** Luu HT, Hsieh C-L, Chuang C-R, Chen C-W, Tran NT, Vu NL, et al. (2023) *Langbiangia*, a new genus of Gesneriaceae endemic to Langbiang Plateau, southern Vietnam and a taxonomic endeavor to achieve key targets of the post-2020 global biodiversity framework. PLoS ONE 18(5): e0284650. <https://doi.org/10.1371/journal.pone.0284650>

**Editor:** Abul Khayer Mohammad Golam Sarwar, Bangladesh Agricultural University, BANGLADESH

**Received:** October 21, 2022

**Accepted:** March 17, 2023

**Published:** May 17, 2023

**Copyright:** © 2023 Luu et al. This is an open access article distributed under the terms of the [Creative Commons Attribution License](https://creativecommons.org/licenses/by/4.0/), which permits unrestricted use, distribution, and reproduction in any medium, provided the original author and source are credited.

**Data Availability Statement:** All relevant data are available within the paper and its [Supporting Information](#) files.

**Funding:** Parts of this research were supported by grants from Academia Sinica, Taiwan to K-FC. HTL, NLV and part of field collection are funded by Vietnam National Foundation for Science and Technology Development (NAFOSTED) under grant number 106.03-2020.38. The funders had no role

## Abstract

Situated in the southern end of the Annamite Mountain Range, Langbiang Plateau is a major biodiversity hotspot of southern Vietnam known for high species diversity and endemism. To achieve effective conservation, parts of the plateau were designated as the Langbiang Biosphere Reserve, an UNESCO World Network aiming to improve relationships between inhabitants and their environments. Amongst the rich endemic flora of the plateau are three gesneriads ascribed to *Primulina*, a calciphilous genus with high species diversity in the vast limestone karsts stretching from southern China to northern Vietnam. However, a recent phylogenetic study questioned the generic placement of the Langbiang *Primulina*, corroborating with observations on the geographical distribution, habitat preference, and phyllotaxy of the three species. Based on phylogenetic analyses of nuclear ITS and plastid *trnL-F* DNA sequences of a comprehensive sampling covering nearly all genera of the Old World Gesneriaceae, we demonstrate that the three Langbiang *Primulina* species form a fully supported clade distantly related to other *Primulina*. As this clade is biogeographically, ecologically, morphologically, and phylogenetically distinct worthy of generic recognition, we propose to name it ***Langbiangia* gen. nov.** to highlight the rich and unique biodiversity of the Langbiang Plateau. By means of this taxonomic endeavor, we are hoping to raise the conservation awareness of this biodiversity heritage of southern Vietnam and promote the importance of Langbiang Biosphere Reserve that is crucial for achieving action-oriented global targets of the post-2020 global biodiversity framework (GBF) of the UN Convention on Biological Diversity (CBD)—effective conservation and management of at least 30% of biodiverse terrestrial, inland water, and coastal and marine areas by 2030—that has been agreed at the COP15 in Montréal in December 2022.

in study design, data collection and analysis, decision to publish, or preparation of the manuscript.

**Competing interests:** The authors have declared that no competing interests exist.

## Introduction

The realization that collaboration with environmental and natural resource stakeholders (Fig 1) is essential for effective conservation of biodiversity [1, 2] has instigated the ideas of “other effective area-based conservation measures (OECMs)” to complement traditional protected and preserved areas such as national parks and nature reserves [3]. An example of the OECMs is UNESCO (United Nations Educational, Scientific and Cultural Organization) Biosphere Reserves (BRs) [4]. First introduced in 1971, UNESCO Biosphere Reserves are a global network of “learning places for sustainable development” using “interdisciplinary approaches to understanding and managing changes and interactions between social and ecological systems, including conflict prevention and management of biodiversity” [5]. As of now, the World Network of Biosphere Reserves consists of 738 sites in 134 countries aiming to improve relationships between inhabitants and their environments [5]. Given their integrated nature, UNESCO BRs can facilitate greatly the achievement of the action-oriented global targets of the post-2020 global biodiversity framework (GBF) agreed at the 15<sup>th</sup> meeting of the Conferences of Parties (COP 15) to the UN Convention on Biological Diversity (CBD) in Montréal in December 2022 [6]—effective conservation and management of at least 30% of biodiverse terrestrial, inland water, and coastal and marine areas by 2030 [4]. Unfortunately, although current

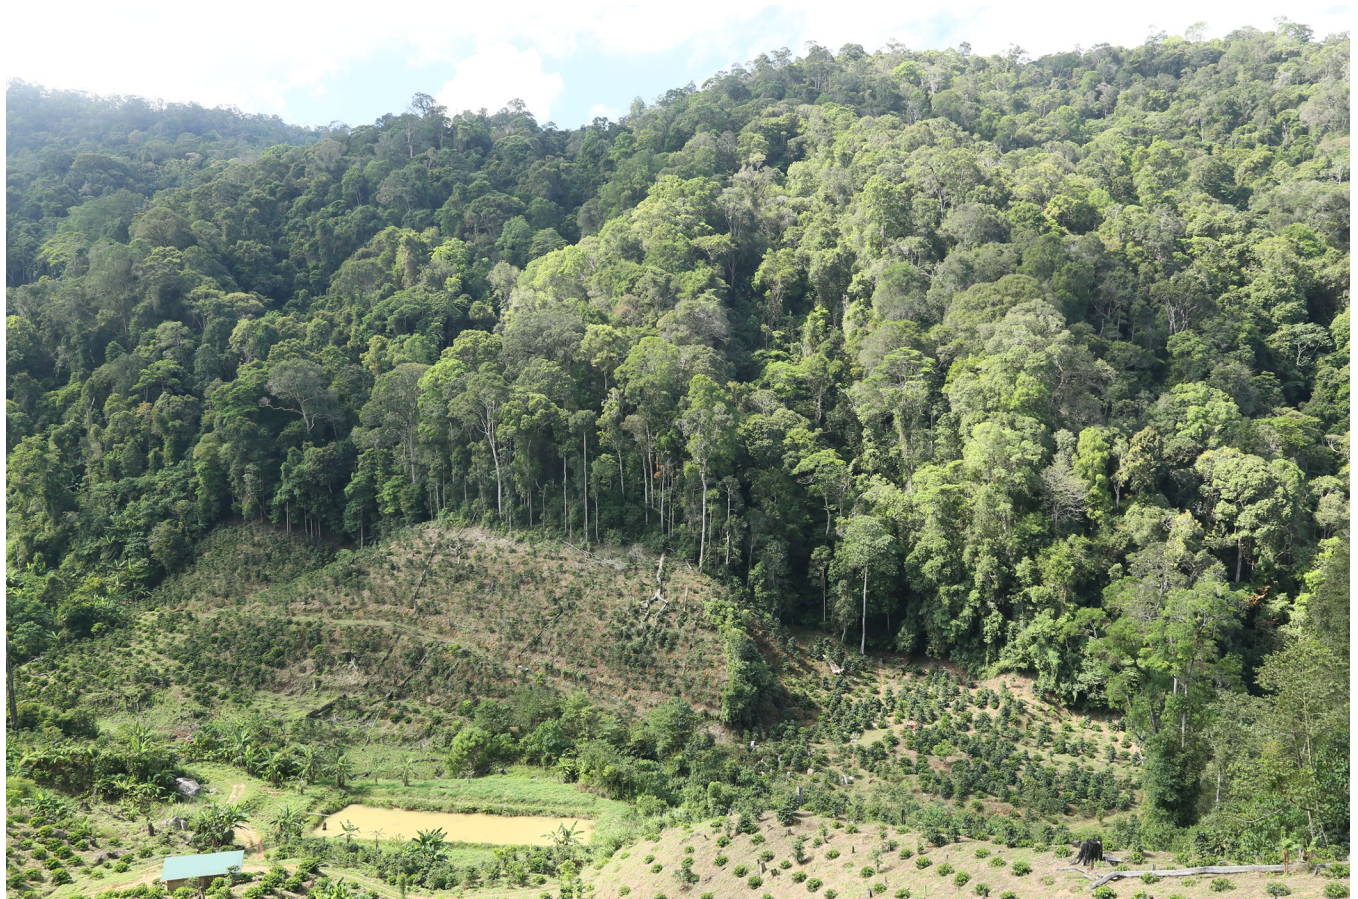

**Fig 1. Broad-leaved evergreen forest and expanding coffee plantation in Langbiang Plateau.** As in much of the tropical countries, the biodiverse montane forests of the Langbiang Plateau are being cleared for agriculture such as coffee plantation, threatening the native flora and fauna and the ecosystem functions (photo: C.-W. Chen).

<https://doi.org/10.1371/journal.pone.0284650.g001>

UNESCO BRs cover more than 7 million km<sup>2</sup> and could contribute ca. 4.5% to the conventional area-based protected areas [4], Biosphere Reserves are in general far less recognized than traditional protected areas such as national parks [7]. The issue is particularly dire in developing countries such as Vietnam, which boasts a remarkably high biodiversity [8, 9] and is home to 11 UNESCO Biosphere Reserves, the second-highest number in SE Asia [10–12]. To fully implement functions of UNESCO BRs, the importance of awareness-raising and outreach has constantly been emphasized [7, 12, 13].

Located within the Langbiang Plateau (Figs 1 and 2), Langbiang Biosphere Reserve is the 9<sup>th</sup> UNESCO BRs in Vietnam [14]. Langbiang Plateau (also spelled as Lam Vien Plateau or known as Da Lat Plateau) is situated in the southern end of the Annamite Mountain Range and bordered by the Provinces of Dak Lak, Khanh Hoa, Lam Dong, and Ninh Thuan of Vietnam (Fig 2). As a long-recognized biodiversity hotspot of southern Vietnam, a portion of the Langbiang Plateau

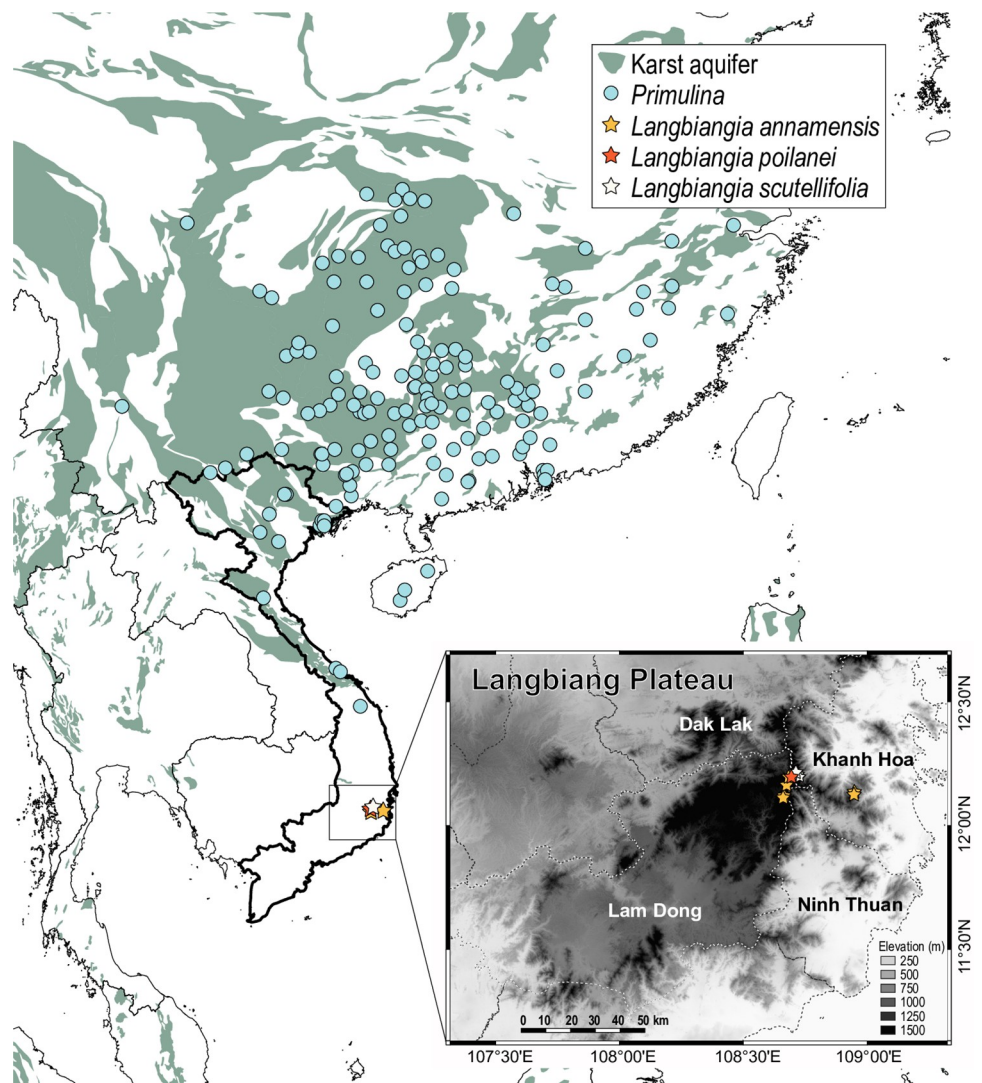

**Fig 2. Distribution of *Langbiangia* and *Primulina*.** The map was generated using QGIS 3.24.1 [60]. The basemap of karst aquifers was downloaded from WHYMAP [61], which can be freely used and copied for educational and other non-commercial purposes. The distributions were mapped based on occurrence records retrieved from Global Biodiversity Facility [62]. The distribution of *Langbiangia poilanei* was plotted based on information taken from the holotype. This work is licensed under a CC BY 4.0 license.

<https://doi.org/10.1371/journal.pone.0284650.g002>

covering 275,439 ha has been protected as the Bidoup—Nui Ba National Park, which is also the core zone of the Langbiang Biosphere Reserve designated by UNESCO in 2015 [14]. Langbiang Biosphere Reserve is home to many rare and endangered mammals such as Indochinese tiger, yellow-cheeked gibbon, Indian bison, etc. [14]. Additionally, a rich diversity in bats has also been documented in the region [15]. In the recent decade, several new vertebrates including six fishes [16, 17], three snakes [18–20], and four amphibians [21–24] were described from the Langbiang Plateau. Across the plateau, cryptic genetic diversity was also detected in the frog genus *Leptolalax* [25]. The plateau is also known for its high fungal diversity [26, 27] and the only habitat of the rare holoparasitic plant *Sapria himalayana* Griff. (Rafflesiaceae) in Vietnam [28]. Langbiang Plateau is also known as the prime habitats of numerous vascular plant species and in the recent decade, a wide range of vascular plant taxa have also been described and/or recorded, including 16 ferns [29–32], one Schisandraceae [33], three Lauraceae [33, 34], five orchids [35, 36], one bamboo [37], one Zingiberaceae [33], one legume [38], one aroid [39], one Menispermaceae [40], one Daphniphyllaceae [33], four stone oaks [41, 42], one Euphorbiaceae [43], two Rosaceae [33], two begonias [44], one Clusiaceae [45], one Rutaceae [33], seven camellias [46–50], four Nyssaceae [33, 51], one ginseng [52], one Loranthaceae [53], two hollies [33], one Icacinaceae [33], one Symplocaceae [33], one Rubiaceae [54], and five gesneriads [55–58]. However, the rich and unique biological diversity of the Langbiang Plateau has continuously been threatened by growing land demands for agriculture (Fig 1) and residency [59]. These land-use changes thus underline the function of UNESCO World Network of Biosphere Reserves for sustainable development of the biodiverse Langbiang Plateau.

The predominantly Old World subfamily Didymocarpoideae of the African Violet Family Gesneriaceae is composed of ca. 2,500 species [63]. In recent decades, recorded diversity in the subfamily has grown considerably as new taxa are being described continuously [e.g., 58, 64–66] especially in Vietnam [55–58, 66–71]. However, molecular phylogenetic studies in the past decade also showed that traditional taxonomy of Gesneriaceae had utilized traits that are homoplasious [72–76]. Consequently, infrafamilial classification and generic delimitation of Gesneriaceae have undergone drastic changes in the past two decades [63, 77]. One of the most extreme examples of such changes has been *Chirita* Buch.-Ham. ex D.Don. Traditionally, *Chirita* was known by the possession of a bifid stigma characterized by undeveloped upper lobe and bifidly developed lower lobe known as the chiritoid stigma [75, 78]. However, molecular phylogenetic analyses showed that *Chirita* was highly polyphyletic [75, 79, 80], with the type species *C. urticifolia* Buch.-Ham. ex D.Don intermingled with *Henckelia* Spreng. that was published earlier than *Chirita* and thus has the taxonomic priority [75]. To establish a stable and phylogeny-based taxonomy of Gesneriaceae, the name *Chirita* was synonymized and its constituted species were transferred to *Codonoboea* Ridl., *Damrongia* Kerr ex Craib, *Henckelia*, *Microchirita* (C.B.Clarke) Yin Z.Wang ( $\equiv$  *Chirita* sect. *Microchirita* C.B.Clarke), *Liebigia* Endl. ( $\equiv$  *Chirita* sect. *Liebigia* (Endl.) C.B.Clarke), and *Primulina* Hance ( $\equiv$  *Chirita* sect. *Gibbosaccus* C.B.Clarke) [75].

With the inclusion of former members of *Chirita* sect. *Gibbosaccus* as well as *Chiritopsis* W. T.Wang and *Wentsaiboea* D.Fang & D.H.Qin [64, 80], and the addition of more than 70 new species, the recircumscribed *Primulina* has been expanded from a monotypic genus to its current size of 227 species [64, 81, 82]. However, subsequent phylogenetic analyses revealed that some former members placed in *Chirita* sect. *Gibbosaccus* by Wood 1974 [78] and transferred to *Primulina* without DNA data by Weber et al. 2011 [75] should be placed in *Deinostigma* W. T.Wang & Z.Y.Li [83, 84]. More recently, *Chirita umbrophila* C.Y.Wu ex H.W.Li, a species with uncertain generic placement [75], was shown to be conspecific with *Loxostigma kurzii* (C. B.Clarke) B.L.Burt [85]. On the other hand, phylogenetic studies of materials sampled from further botanical exploration also revealed lineages that are distinct and worthy of generic recognition (e.g., *Actinostephanus* F.Wen, Y.G.Wei & L.F.Fu [65], *Billolivia* D.J.Middleton [86],

*Chayamaritia* D.J.Middleton & Mich.Möller [87], *Glabrella* Mich.Möller & W.H.Chen [88], *Michaelmoelleria* F.Wen, Y.G.Wei & T.V.Do [66], *Middletonia* C.Puglisi [89], *Rachunia* D.J.Middleton & C.Puglisi [90], etc.). These recent taxonomic changes and novelties of the didymocaroid Gesneriaceae underscore the importance of incorporating molecular information in achieving a stable classification of Asian Gesneriaceae.

Among the five recently described gesneriads from the Langbiang Plateau, *Primulina scutellifolia* Luu, N.L.Vu & T.Q.T.Nguyen [58] is the latest described species. On the Langbiang Plateau, *P. scutellifolia* is distributed in close proximity with *P. poilanei* (Pellegr.) Mich.Möller & A.Weber (Fig 3) and often sympatric with *P. annamensis* (Pellegr.) Mich.Möller & A.Weber [58] (Fig 2). Both *P. annamensis* and *P. poilanei* were initially described as *Chirita* Buch.-Ham. ex D. Don (i.e., *C. poilanei* Pellegr. [91] and *C. annamensis* Pellegr. [92, 93]) and placed under *Chirita* sect. *Gibbosaccus* by Wood 1974 [78]. Along with other species of *Chirita* sect. *Gibbosaccus*, *C. annamensis* and *C. poilanei* were both transferred to *Primulina* in Weber et al. 2011 [75], though neither of these two species were sampled for phylogenetic analyses. *Primulina scutellifolia* was described as a morphologically similar species of *P. annamensis*, differing from the latter by several morphological characteristics including scutellate leaves, less densely pilose petioles, and the stigma with enlarged lower lip but without upper lip [58]. Likewise, no molecular data was generated for *P. scutellifolia* to assure its generic placement [58].

Biogeographically, *Primulina annamensis*, *P. poilanei*, and *P. scutellifolia* are all restricted to the Langbiang Plateau, representing the southernmost and disjunctively distributed species of *Primulina* (Fig 2). Ecologically, while a majority of *Primulina* are calciphilous plants on limestone karsts (Fig 2) of lower elevations [64, 94–96], *P. annamensis*, *P. poilanei*, and *P. scutellifolia* grow on humid fertile soils of the evergreen broad-leaved forest at elevation of 1,450–2,000 m [58, 78, 92, 93, 97]. Morphologically, *P. annamensis*, *P. poilanei*, and *P. scutellifolia* also differ from the typical *Primulina* by their alternate and spirally arranged phyllotaxy [58, 78], while a majority of *Primulina* are characterized by decussate or whorled leaves (Fig 4). Additionally, the peltate and scutellate leaf bases of *P. scutellifolia* are reminiscent to *Deinostigma poilanei* (Pellegr.) W.T.Wang & Z.Y.Li [98], *D. serratum* F.Wen, L.N.Tuan & D.Dien [99], and *D. tamianum* (B.L.Burtt) D.J.Middleton & H.J.Atkins [58] not known in any other species of *Primulina*. Prior to its current placement in *Deinostigma* W.T.Wang & Z.Y.Li, *D. tamianum* [83] was also first described as *Chirita* (i.e., *Chirita tamiana* B.L.Burtt) and classified under *Chirita* sect. *Gibbosaccus* [78]. Along with *C. annamensis* and *C. poilanei*, *C. tamiana* was also transferred to *Primulina* without molecular data [75], and was later transferred to the expanded *Deinostigma* [84]. Morphologically, however, in contrast to the caulescent habit and bilocular ovaries observed in *Deinostigma*, all three Langbiang *Primulina* are acaulescent with unilocular ovaries. Phylogenetically, Xu et al. 2021 [95] showed that their sampled *Primulina annamensis* (i.e., *Primulina annamensis* ANNA) was not placed within the ‘true’ *Primulina* but sister to their sampled *Deinostigma poilanei* (i.e., *Deinostigma poilanei* POIL), though no other *Deinostigma* species were sampled and the taxonomic implications were not discussed. Therefore, it remains uncertain whether the three Langbiang *Primulina* species belong to *Primulina*, *Deinostigma*, or even a unique genus of itself. The biogeographical, ecological (Fig 2), morphological (Figs 3 and 4), and phylogenetic [95] uniqueness of the Langbiang Plateau *Primulina* thus prompted us to conduct phylogenetic analyses to confirm generic placements of the three species.

## Materials and methods

### Ethics statement

The samples used in this studied were collected under the permits granted by Van Huong Le, the director of Bidoup—Nui Ba National Park.

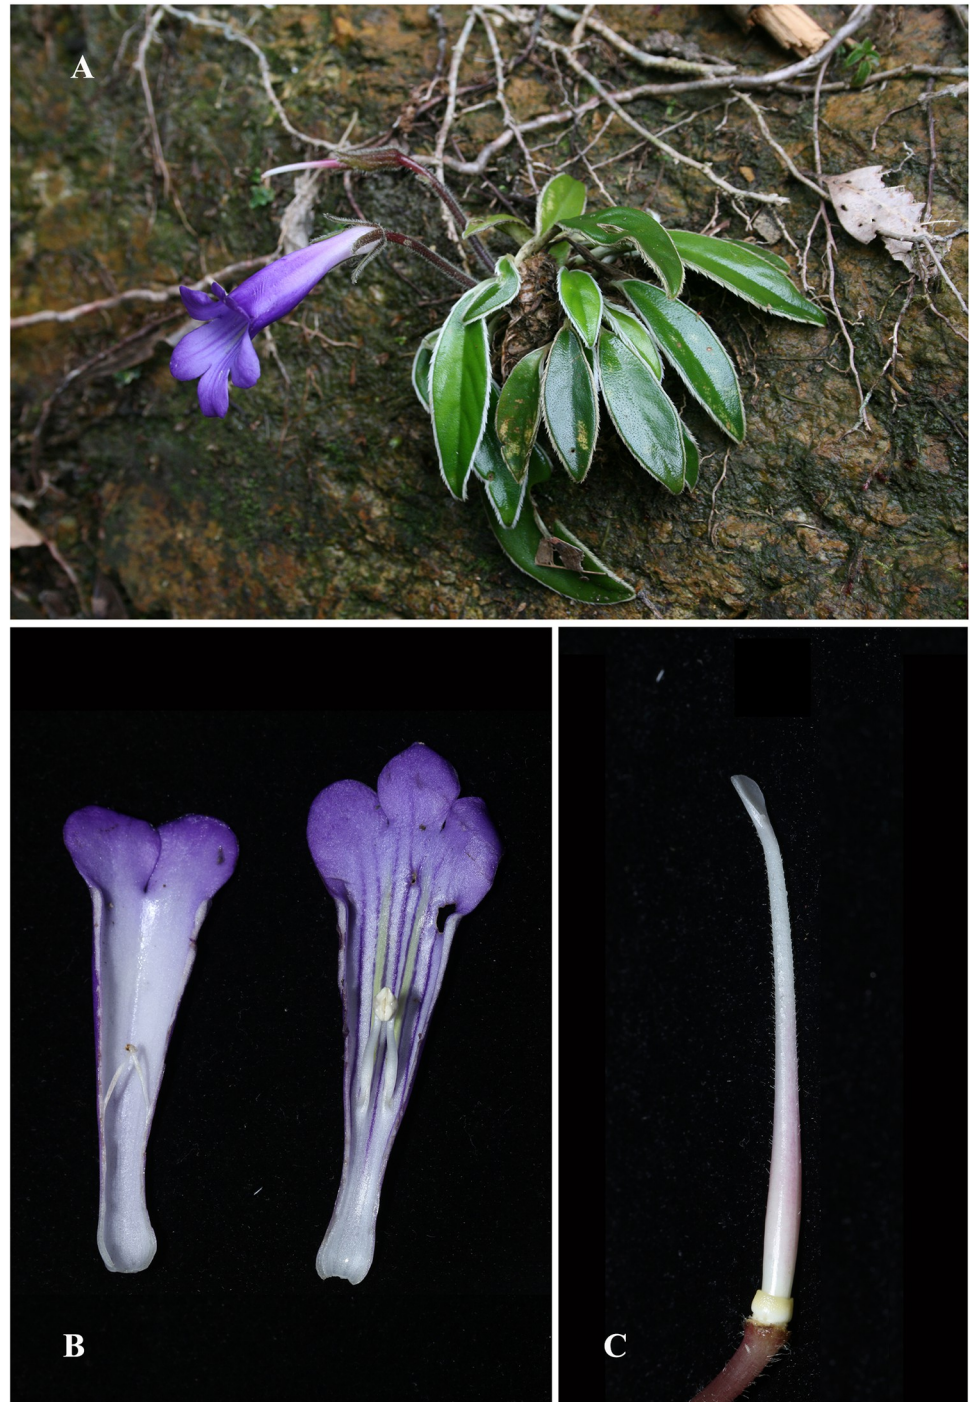

**Fig 3.** *Langbiangia poilanei*. (A) Habit. (B) Corolla, longitudinal dissection with stamens. (C) Disc, ovary and style. Photos by Hong Truong Luu and Minh Tri Dang.

<https://doi.org/10.1371/journal.pone.0284650.g003>

### Inclusivity in global research

Additional information regarding the ethical, cultural, and scientific considerations specific to inclusivity in global research is included in the [S1 Checklist](#).

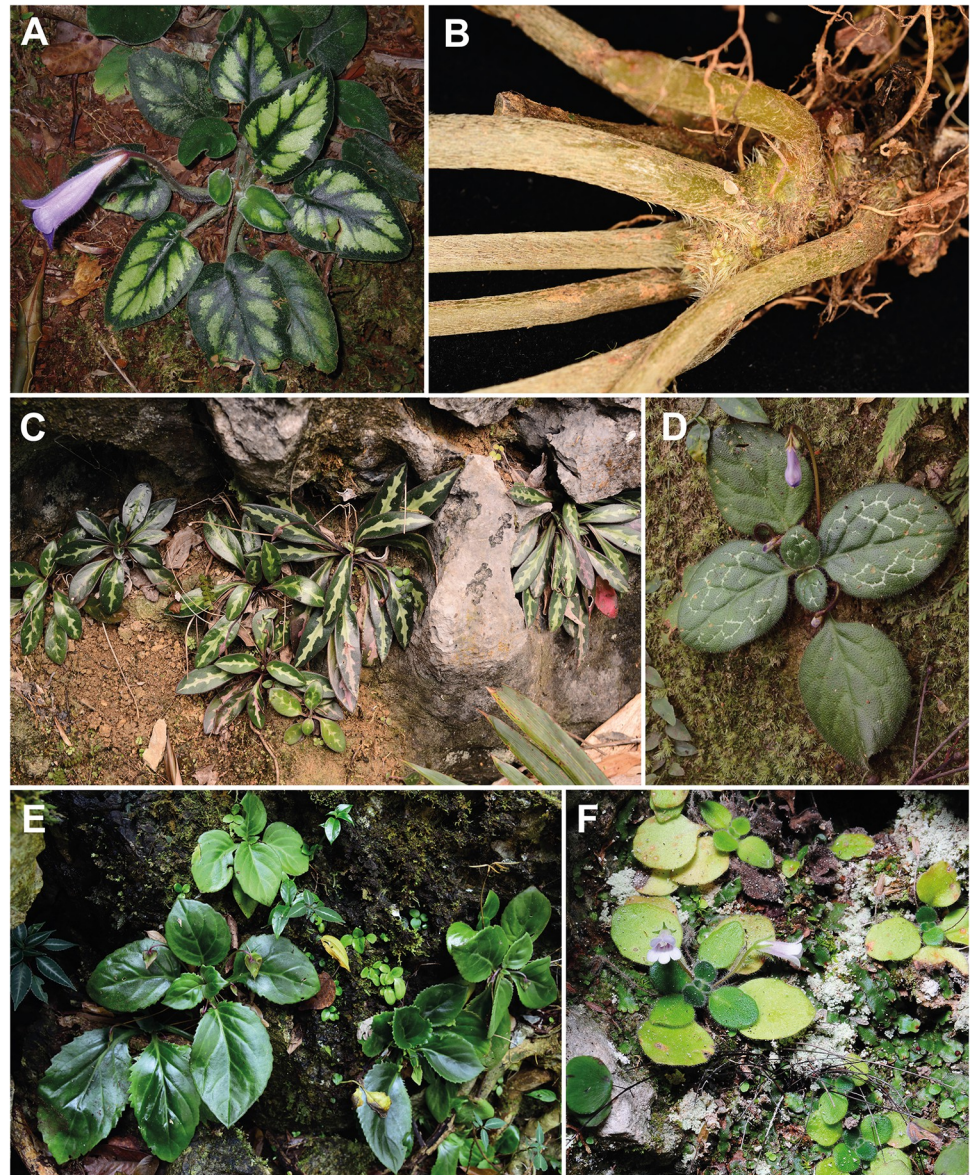

**Fig 4. Phyllotaxy of *Langbiangia* and *Primulina*.** (A) *Langbiangia annamensis*, photo by Maxim S. Nuraliev / CC BY-NC 4.0 (<https://www.inaturalist.org/observations/38536524>) (B) The acaulescent stem of *Langbiangia scutellifolia*. (C) *Primulina minutimaculata*. (D) *Primulina dryas*. (E) *Primulina lungzhouensis*. (F) *Primulina minor*. B–E by C.-L. Hsieh, and F by K.-F. Chung.

<https://doi.org/10.1371/journal.pone.0284650.g004>

### Sampling and DNA extraction

To test generic placements of the three Langbiang *Primulina* species, we sampled two individuals of *P. annamensis*, two *P. poilanei*, and one *P. scutellifolia*. The material of *P. scutellifolia*, which was assessed as Critically Endangered [58], was sampled from the type collection. As *P. scutellifolia* was considered morphologically similar to *Deinostigma* [58], we also collected *D. eberhardtii* (Pellegr.) D.J.Middleton & H.J.Atkins (Bach 0512), which previously has never been analyzed molecularly, to complement the sampling of the genus. Additionally, Bach 0513, which is an unknown gesneriad akin to *Deinostigma*, was also added to the analyses. Voucher specimens (Table 1) were deposited in the Herbarium of Southern Institute of

**Table 1. Sampling information and GenBank accession numbers of newly sequenced individuals.** All voucher specimens were deposited in the Herbarium of Southern Institute of Ecology (SGN).

| Code       | Species                        | Voucher                                                     | Locality                                                                                                          | GenBank accession numbers ( <i>trnL-F</i> /ITS) |
|------------|--------------------------------|-------------------------------------------------------------|-------------------------------------------------------------------------------------------------------------------|-------------------------------------------------|
| Bach 0512  | <i>Deinostigma eberhardtii</i> | <i>Tran Ngoc Toan Bach 0512</i>                             | Da Nang City, Lien Chieu District, Nam Hai Van Special Use Forest                                                 | OP617258/OP605498                               |
| Bach 0513  | <i>Deinostigma sp.</i>         | <i>Tran Ngoc Toan Bach 0513</i><br>(living collection, SGN) | Quang Nam Province, Nong Son District, Quang Nam Elephant Sanctuary                                               | OP617259/OP605499                               |
| BD77       | <i>Primulina annamensis</i>    | <i>Dang Minh Tri BD-TN3-077</i>                             | Lam Dong Province, Lac Duong District, Da Chais Commune, Bidoup—Nui Ba National Park, Bidoup Forest Dynamics Plot | OP508008/OP508034                               |
| CR024      | <i>Primulina annamensis</i>    | <i>C.-W. Chen s.n.</i>                                      | Lam Dong Province, Lac Duong District, Giang Ly Ranger Station                                                    | OP617260/OP605500                               |
| CR027      | <i>Primulina poilanei</i>      | <i>C.-W. Chen s.n.</i>                                      | Khanh Hoa Province, Khanh Vinh District                                                                           | OP617261/OP605501                               |
| CR028      | <i>Primulina poilanei</i>      | <i>C.-W. Chen s.n.</i>                                      | Khanh Hoa Province, Khanh Vinh District                                                                           | OP617262/OP605502                               |
| Luu KH0945 | <i>Primulina scutellifolia</i> | <i>Luu KH0945</i>                                           | Khanh Hoa Province, Khanh Vinh District, Son Thai Commune                                                         | OP508007/OP508033                               |

<https://doi.org/10.1371/journal.pone.0284650.t001>

Ecology (SGN), Ho Chi Minh City, Vietnam. The genomic DNAs were extracted from 0.2 g of silica-dried leaf material using the CTAB method [100]. The quantity and quality of the extracted DNAs were checked by electrophoresis on 1.5% agarose gels.

Based on the most updated classification of Gesneriaceae, *Primulina* and *Deinostigma* are both placed in subtribe Didymocarpaceae, tribe Trichosporeae, subfamily Didymocarpoideae [63, 77, 96, 101]. To maximize taxon sampling while exploiting DNA sequences available in the GenBank, we sequenced the internal transcribed spacer (ITS) of the nuclear ribosomal DNA (including the 5.8S gene) and the plastid *trnL-trnF* intergenic spacer (*trnL-F*), which have been the most widely used molecular markers in reconstructing phylogenetic relationships of Asian Gesneriaceae and delimitating new gesneriad genera [74–76, 86–88, 90, 102, 103]. The ITS sequence was amplified by the universal primers, ITS4 and ITS5 [104]. The *trnL-F* was amplified using three primer pairs: *trnL-F\_1F* (5′-GGCGAAATCGGTAGACGCTA-3′) and *trnL-F\_1R* (5′-CCCAGATACAGATTCGGGCC-3′), *trnL-F\_2F* (5′-GGCCCGAATCTGTATCTGGG-3′) and *trnL-F\_2R* (5′-ACCGTTAACGAACAAAGCGG-3′), and *trnL-F\_3F* (5′-CCGCTTTGTTTCGTTAACGGT-3′) and *trnL-F\_3R* (5′-CCATGTGCCAGGAACCAGAT-3′), designed using Primer3 v.2.3.7 [105] implemented in the program Geneious Prime® v.2022.1.1 [106]. The total volume for all polymerase chain reactions (PCRs) was 30 µl with 15 µl of Q-Amp™ 2x ScreeningFire Taq Master Mix (Bio-Genesis Technologies Inc., Taiwan), 9 µl of ddH<sub>2</sub>O, 4 µl of DNA, and 1 µl of each of the two primers. All PCRs were carried out under the thermocycling program which starts from 5 minutes at 95° C for initial denaturation, followed by 40 cycles of amplification of 1 minute at 95° C, 1 minute at 56° C for, and 1 minute at 72° C, and ends with the final extension step of 7 minutes at 72° C. The PCR products were Sanger sequenced by Genomics BioScience and Technology Co. (Taipei, Taiwan). All newly generated DNA sequences (S1 Table) have been deposited in GenBank (<https://www.ncbi.nlm.nih.gov/genbank/>).

## Sequence alignment and phylogenetic analyses

Geneious was used to conduct sequencing quality check and sequence assembly. In addition to the newly generated sequences, DNA sequences of 256 species, representing nearly all genera, all subtribes, and all tribes (i.e., Epithemateae and Trichosporeae) of subfamily Didymocarpoideae, were downloaded from GenBank (S1 Table). Our sampling of the subtribe Didymocarpaceae included 135 species representing all genera except for the doubtful genus *Sepikeya* Schltr.



[63]. To ease the computational loading, we only sampled 16 species of *Primulina* that represent all major clades of the genus [64]. *Titanotrichum oldhamii* (Hemsl.) Soler. of tribe Titanotricheae, subfamily Gesnerioideae was chosen to root the tree based on recent studies [63, 77]. After incorporating the newly generated sequences, each of the ITS and *trnL-F* matrix was aligned separately by MAFFT v.7.490 [107] using Geneious with default settings. Each sequence in the alignment was manually trimmed to the same length, and the sites with >98% of gaps were excluded by applying the “mask alignment” function in Geneious.

Because of low phylogenetic resolutions in preliminary maximum likelihood (ML) analyses of individual matrices (S1 and S2 Figs) using RAXML v.8.2.11 [108], the two matrices were concatenated (S1 File) as executed in a majority of Gesneriaceae phylogenetic analyses [74–76, 86, 87, 90, 102, 103] using AMAS python scripts [109]. For the concatenated matrix, we conducted phylogenetic analyses based on both (ML) and Bayesian inference (BI) using RAXML v.8.2.11 and MrBayes v.3.2.7a [110], respectively. ML analyses were conducted with the settings of GTR+GAMMA for nucleotide substitution model and rapid bootstrap (-f a option) with 2000 replicates. Nodes in the ML tree with bootstrap support (BS) lower than 50% were collapsed into polytomies by using TreeCollapserCL 4 [111]. Prior to the BI analyses, the best-fit nucleotide model for each partition was determined by ModelFinder [112] in IQ-TREE v.2.0.6 [113] with the setting of -mset mrbayes. For BI analyses, according to ModelFinder’s results, the SYM+I+G and GTR+F+G models were applied to ITS and *trnL-F* partitions, respectively, in MrBayes with all model parameters unlinked among partitions and allowing the overall rate to vary across partitions. In MrBayes, two independent runs with four chains each of the Markov Chain Monte Carlo (MCMC) simulations were set to perform 10,000,000 generations with sampling frequency of every 1000 generations and the first 25% of generations discarded as burn in. The resulting trees were summarized into a phylogram with clade credibility (posterior probability) values. The final phylogenies of ML and BI analyses were visualized in FigTree v.1.4.4 [114].

## Nomenclature

The electronic version of this article in Portable Document Format (PDF) in a work with an ISSN or ISBN will represent a published work according to the International Code of Nomenclature for algae, fungi, and plants, and hence the new names contained in the electronic publication of a *PLOS ONE* article are effectively published under that Code from the electronic edition alone, so there is no longer any need to provide printed copies.

In addition, new names contained in this work have been submitted to IPNI, from where they will be made available to the Global Names Index. The IPNI LSIDs can be resolved and the associated information viewed through any standard web browser by appending the LSID contained in this publication to the prefix <http://ipni.org/>. The online version of this work is archived and available from the following digital repositories: PubMed Central and LOCKSS.

## Results and discussion

The DNA alignment of 242 ITS sequences was 956 bp in length with 838 (87.7%) parsimony informative sites, while the *trnL-F* alignment of 252 sequences was 931 bp in length with 604 (64.9%) parsimony informative sites. The final concatenated matrix of 256 accessions was 1,887 bp in length with 1,136 (60.2%) parsimony informative sites. Results of BI (Fig 5 and S3 Fig) and ML (S4 and S5 Figs) analyses are largely congruent, with BI analysis showing better resolution and higher support values (S3 and S5 Figs). A simplified Bayesian inference phylogeny with ML bootstrap support values is shown in Fig 5. Rooted by *Titanotrichum oldhamii* of the subfamily Gesnerioideae, the monophyly of both tribes Epithemateae and Trichosporeae

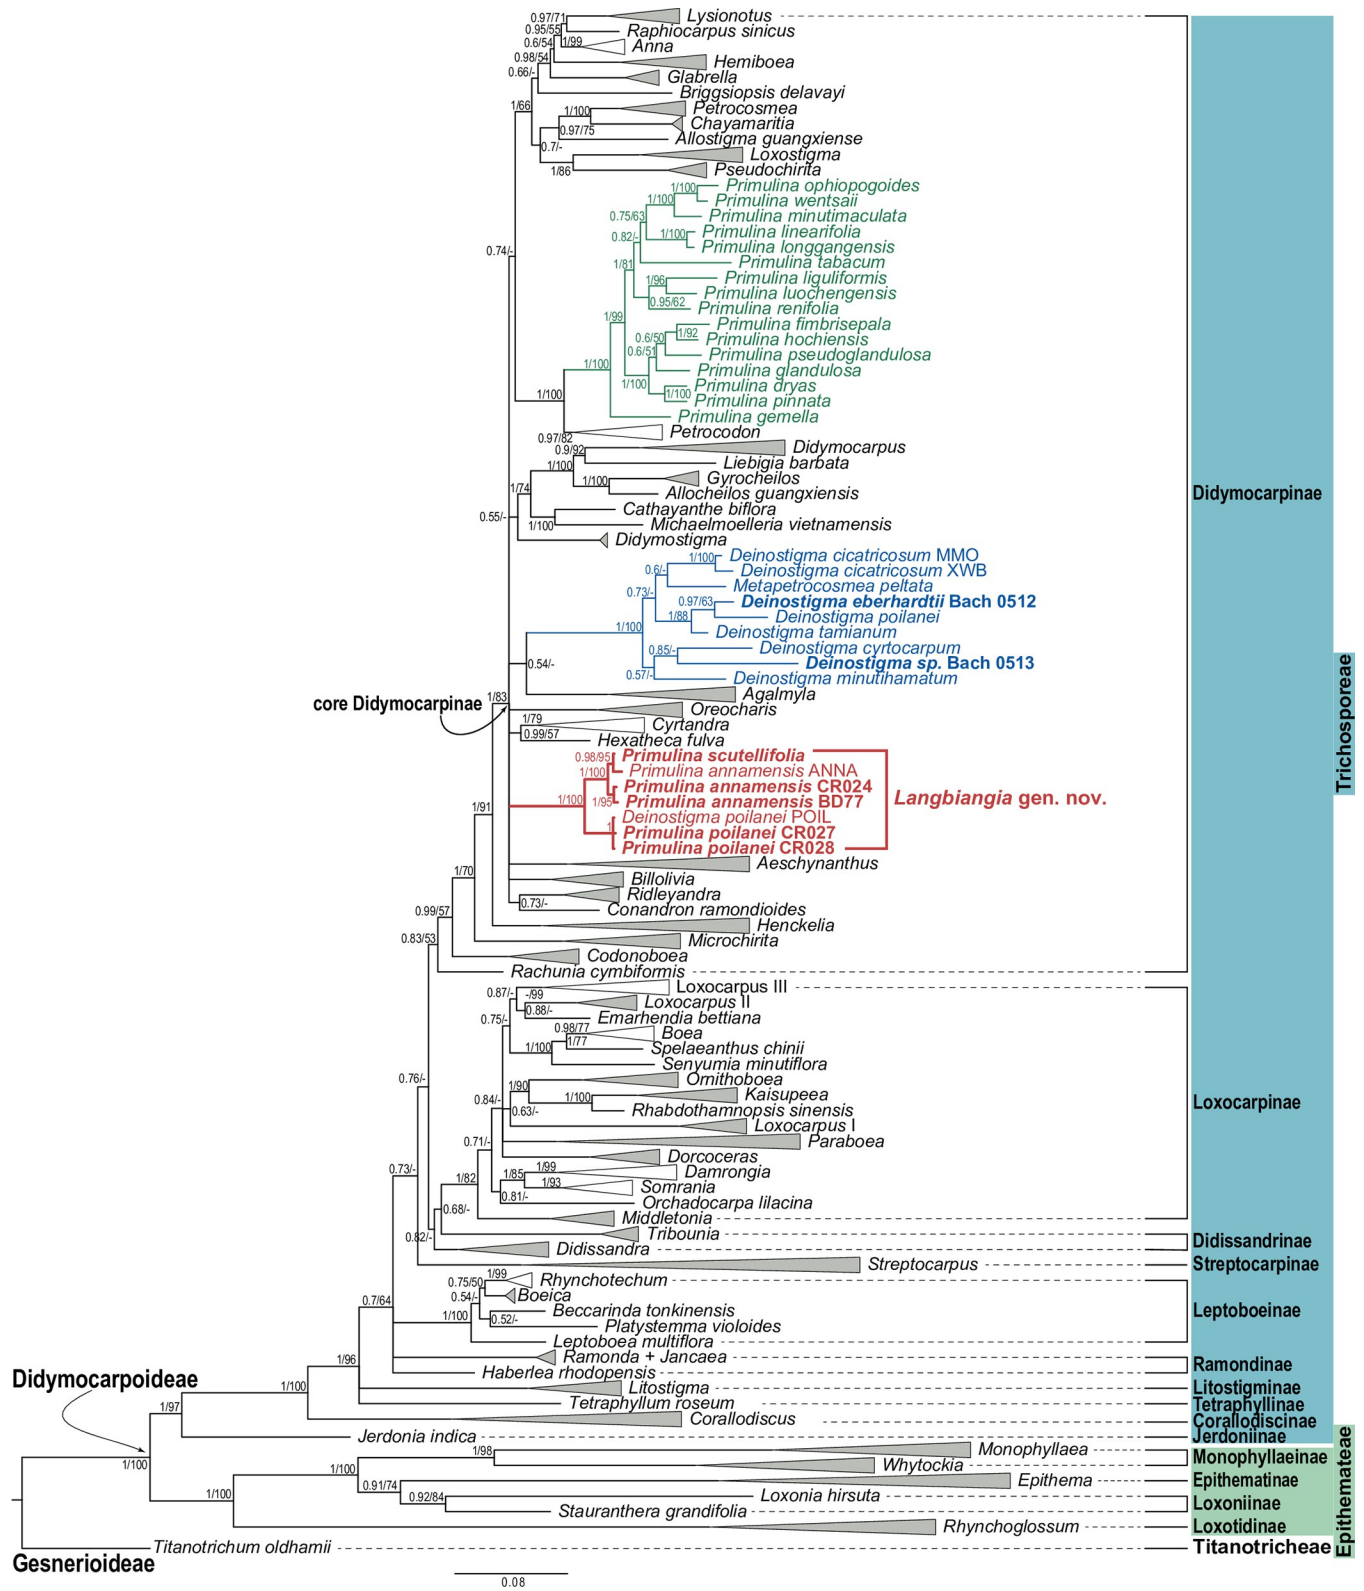

**Fig 5. Simplified Bayesian inference tree of Didymocarpoideae based on combined *trnL-F* and ITS sequences.** Numbers at the node indicate Bayesian posterior probability (≥ 0.5), with ML bootstrap value (≥ 50%) shown after slash (/). All genera except for *Primulina*, *Deinostigma* and *Langbiangia* gen. nov. are collapsed into triangles, with gray triangles denoting genera/clades that are fully supported in both Bayesian and ML analyses. The infrafamilial classification of Weber et al. 2013 [77] and Weber et al. 2020 [63] is followed. This tree is simplified from the S3 Fig. ML bootstrap values are retrieved from S5 Fig.

<https://doi.org/10.1371/journal.pone.0284650.g005>

of the subfamily Didymocarpoideae is recovered (Fig 5). Within the tribe Trichosporeae, subtribes Jerdoniinae, Corallodiscinae, Tetraphyllinae, and Litostigminae formed successive sister clades to the rest of the subtribes as revealed in previous studies [63, 77]. Relationships among the rest of the subtribes, i.e., Ramondinae, Leptoboenaie, Streptocarpinae, Didissandrinae, Loxocarpinae, and Didymocarpinae, remained unresolved or poorly resolved (Fig 5).

Within the subtribe Didymocarpinae, *Rachunia*, *Codonoboaea*, *Microchirita*, and *Henckelia* formed successive sister groups to an unresolved clade composed of all other genera of the subtribe (i.e., ‘core’ Didymocarpinae), congruent with previous studies [66, 90]. As shown in previous phylogenetic studies of Didymocarpinae using ITS and *trnL-F* sequences, relationships within the ‘core’ Didymocarpinae remained poorly resolved [75, 77, 79, 86, 87, 90]. The employment of genomic data such as whole plastome sequences [96] and target capture [101] will be essential to clarify and understand this apparent radiation of Asian gesneriad clade.

Together with *Primulina annamensis* ANNA and *Deinostigma poilanei* POIL that were sequenced by Xu et al. 2021 [95], our newly sequenced Langbiang *Primulina* formed a fully supported clade within the ‘core’ Didymocarpinae (Fig 5), while other sampled species of ‘true’ *Primulina* formed a fully supported clade sister to *Petrocodon* Hance as revealed in previous studies [64, 96]. Except for *D. poilanei* POIL [95], all other sampled *Deinostigma* and its sister genus *Metapetrocosmea*, including our newly sequenced *D. eberhardtii* Bach 0512 and *Deinostigma* sp. Bach 0513, as well as *D. poilanei* KN201 that was used for recircumscribing *Deinostigma* by Möller et al. 2016 [83], formed a fully support clade (Fig 5). Although no detailed voucher information was provided for *D. poilanei* POIL [95], given that both ITS (S1 Fig) and *trnL-F* (S2 Fig) sequences of *D. poilanei* POIL are almost identical to our sequenced Langbiang *Primulina*, our phylogenetic results suggest that *D. poilanei* POIL could be a confusion with and/or misidentification of *Primulina poilanei*, likely resulted from the identical species epithet ‘poilanei’.

Within the Langbiang *Primulina* clade, *P. annamensis* ANNA sequenced by Xu et al. 2021 [95] is sister to *P. scutellifolia* collected from the type collection in both the ITS tree (S1 Fig) and the concatenated tree (Fig 5), rendering *P. annamensis* paraphyletic, though relationships among the three Langbiang *Primulina* species are unresolved in the *trnL-F* tree (S2 Fig). Because *Primulina scutellifolia* is morphologically similar to *P. annamensis* [58], *P. annamensis* ANNA sampled by Xu et al. 2021 [95] might also be a misidentification of *P. scutellifolia*. Alternatively, given the geographical proximity between *P. annamensis* and *P. scutellifolia* [58], the paraphyly of *P. annamensis* with *P. scutellifolia* nested within (Fig 5) also suggests the possibility of hybridization between the two species. Nevertheless, further study with increase sampling and additional molecular markers will be needed to clarify the species boundaries between these two species.

Given the biogeographical, ecological (Fig 2), morphological (Figs 3 and 4), and phylogenetic distinctness (Fig 5) of the Langbiang *Primulina*, our study clearly shows that the clade composed of these three species should be recognized as a distinct genus as those recently described genera of the subtribe Didymocarpinae [65, 66, 86–90]. With the reduction of these three species, the total number of *Primulina* known from Vietnam decreases from 24 [58] to 21 species. As members of this new genus are thus far only known from the Langbiang Plateau, we propose to name the new genus *Langbiangia* to highlight the rich and unique biodiversity of the region. In naming the new genus *Langbiangia*, we are also hoping to raise the conservation awareness and popularize the importance of Langbiang Biosphere Reserves that is crucial for achieving action-oriented global targets of the post-2020 GBF of the UN CBD [6].

## Taxonomic treatment

*Langbiangia* Luu, C.L.Hsieh & K.F.Chung, **gen. nov.** [urn:lsid:ipni.org:names:77306595–1]

Type: *Langbiangia poilanei* (Pellegr.) Luu, C.L.Hsieh & K.F.Chung

**Diagnosis.** *ngbiangia* shares many similar floral traits with *Primulina*, but differs from the latter by its spirally-arranged alternate phyllotaxy. *Langbiangia* is also reminiscent of *Deinostigma*, but could be distinguished by the acaulescent habit and unilocular ovary in *Langbiangia*.

**Description.** aulescent herbaceous perennials. *Rhizomes* terete, sometimes woody, vertical or horizontal, 3–7 mm in diameter, up to 9 cm long. *Leaves* leathery, 3–13, spirally alternate, rosulate; petioles rounded or cylindrical, 1.5–10 cm long, 3 mm in diameter, densely hairy with reflexed hairs; leaf blades broadly ovate to narrowly elliptical, 2.7–14 × 0.6–5.2 cm, apexes acute to obtuse, margins entire, slightly serrulate to sinuate, sometimes densely hairy to glabrous, bases cuneate, sub-cordate, or scutellate-foveate, variously hairy on both surfaces, lateral veins 4–7 pairs, sunken adaxially, densely hairy abaxially. *Inflorescences* 1–5, axillary, cymose, scapiform, flowers 1–3; peduncles 10–18 cm long, 2–3 mm in diameter, sparsely hirsute; *bracts* linear to narrowly triangular, 2–6 mm long, ca. 0.5 mm wide at base. *Calyxes* 5-lobed, divided to the base, lobes equal, narrowly triangular to lanceolate-oblong, 8–14 × 0.8–3 mm, sparsely hairy. *Corollas* infundibuliform, 3.5–5 cm long, 1–1.5 cm in diameter at mouth, ca. 0.5 cm in diameter at base, not pouched, sparsely glandular hairy outside, white, violet or white at base and gradually turning into violet to blue towards the lobes, hairiness inside with two yellow strips on lower part of the corolla; corollas distinctly 2-lipped, upper-lips 2-lobed, lobes broadly ovate, 3.5–4 × 7–8 mm, lower-lips 3-lobed, central lobe orbicular, 7–8 × 7–8 mm, lateral lobes broadly ovate, 7–8 × 8–9 mm. *Stamens* 2, filaments 7–32 mm long, adnate to the corolla tube 16–18 mm from the base, slightly curved or geniculate 2 mm from the point of insertion, free part 13–14 mm long and slightly curved, glabrous or apically sparsely glandular hairy; anthers fused by their entire adaxial surfaces, elliptic, ca. 3 mm long, yellowish, thecae divergent. *Staminodes* 3, apex capitate, yellowish, glabrous, 15–21 mm long, adnate to 12–17 mm from the base of the corolla, free part 3.5–5 mm long. Disc a ring, ca. 1 mm high, slightly 5-lobed. *Gynoecium* 2.2–3.5 cm long, 1.4–2 mm in diameter at base, ca. 0.6 mm below the stigma, glabrous or hairy; stigma obscurely 2-lobed, only the lower lip developed, trapeziform, finely hairy. *Capsules* linear, slightly falcate, oblique in relation to the pedicel, reddish brown or greenish and turn to light yellowish, 6–6.5 × 0.4–0.7 cm, glabrous or sparsely hairy on the apical part, dehiscence along the dorsal side; calyx persistent. Seeds long ellipsoid, translucent brownish.

**Etymology.** e new genus *Langbiangia* is named after the Langbiang Plateau. Situated in the southern end of the Annamite Mountain Range and bordered by the Provinces Dak Lak, Khanh Hoa, Lam Dong, and Ninh Thuan (Fig 1), Langbiang Plateau is a biodiversity hotspot [26, 28, 30] and a portion of the plateau within Lam Dong Province was designated by UNESCO as Langbiang Biosphere Reserve in 2015 for its high regional biodiversity that also includes many endangered species [14]. By naming the clade *Langbiangia*, which is thus far only known from the Langbiang Plateau, we are hoping to raise the conservation awareness of this important heritage of biodiversity of Vietnam.

**Distribution.** Vietnam, known only from the Langbiang Plateau (Khanh Hoa and Lam Dong Provinces).

**Habitat.** On fertile soils of forest floors of montane forests.

### Key to the species of *Langbiangia*

1. Leaf blades narrowly elliptical ..... *L. poilanei*
1. Leaf blades broadly ovate ..... 2

2. Petioles densely pilose; leaf blades flat, with obviously cordate base . . . . . *L. annamensis*  
 2 Petioles appressed downward tomentose; leaf blades scutellate . . . . . *L. scutellifolia*

**1. *Langbiangia annamensis*** (Pellegr.) Luu, C.L.Hsieh & K.F.Chung, **comb. nov.** (Fig 4A)

[urn:lsid:ipni.org:names:77306596-1] ≡ *Chirita annamensis* Pellegr. in Fl. Indo-Chine 4: 530 (1930) ≡ *Primulina annamensis* (Pellegr.) Mich.Möller & A.Weber in Taxon 60(3): 781 (2011).

Type: VIETNAM, Annam, Prov de Nha-trang, massif de Hon-ba, 1000 m, 3 July 1918, A. Chevalier 38697 (lectotype, designated by Wood 1974 [78], p.140: P [MNHN-P-P00602505]).

**2. *Langbiangia poilanei*** (Pellegr.) Luu, C.L.Hsieh & K.F.Chung, **comb. nov.** (Fig 3) [urn:lsid:ipni.org:names:77306597-1]

≡ *Chirita poilanei* Pellegr., Bull. Soc. Bot. France. 73(3): 419. (1926) ≡ *Primulina poilanei* (Pellegr.) Mich.Möller & A.Weber in Taxon 60(3): 784 (2011). (Fig 5).

Type: VIETNAM, Annam, Giang Ly, Nhatrang dans le lit d'un sui (ruisseau), 2000 m alt. forêt Ouest de Nhatrang, 22 May 1922, F. Poilane 3616 (holotype, P [MNHN-P-P00602520]).

**3 *Langbiangia scutellifolia*** (Luu, N.L.Vu & T.Q.T.Nguyen) Luu, C.L.Hsieh, K.F.Chung, **comb. nov.** (Fig 4B) [urn:lsid:ipni.org:names:77306598-1]

≡ *Primulina scutellifolia* Luu, N. L.Vu & T.Q.T.Nguyen in PhytoKeys 187: 16, fig 1 (2021).

Type: VIETNAM, Khanh Hoa Province, Khanh Vinh District, Son Thai Commune, 12° 11'39"N, 108° 43'30"E, at ca. 1485 m elevation, 01 November 2013, *Luu Hong Truong KH0945* (holotype, SGN!; isotypes SGN!, PHH!, VNMN!).

## Supporting information

**S1 Checklist. Checklist of inclusivity in global research.**

(DOCX)

**S1 Fig. Maximum likelihood phylogeny based on ITS sequences.**

(PDF)

**S2 Fig. Maximum likelihood phylogeny based on *trnL-F* sequences.**

(PDF)

**S3 Fig. Bayesian inference phylogeny of Didymocarpoideae based on combined ITS and *trnL-F* sequences.**

(PDF)

**S4 Fig. A simplified maximum likelihood phylogeny based on combined ITS and *trnL-F* sequences.**

(PDF)

**S5 Fig. Maximum likelihood phylogeny based on combined ITS and *trnL-F* sequences.**

(PDF)

**S1 Table. NCBI accession numbers of sampled species.**

(XLSX)

**S1 File. Nexus file for Bayesian inference.** Concatenated alignment of ITS and *trnL-F* sequences and parameters for MrBayes.

(NEX)

## Acknowledgments

We thank Van Huong Le, the director of Bidoup—Nui Ba National Park, for granting permission to sample the materials. Minh Tri Dang (SIE) is acknowledged for taking detailed photos of *Langbiangia poilanei*.

## Author Contributions

**Conceptualization:** Hong Truong Luu, Kuo-Fang Chung.

**Data curation:** Chia-Lun Hsieh, Chia-Rong Chuang.

**Formal analysis:** Chia-Lun Hsieh, Chia-Rong Chuang.

**Funding acquisition:** Hong Truong Luu, Kuo-Fang Chung.

**Investigation:** Hong Truong Luu, Chia-Lun Hsieh, Chia-Rong Chuang, Cheng-Wei Chen, Ngoc Long Vu, Kuo-Fang Chung.

**Methodology:** Chia-Lun Hsieh, Chia-Rong Chuang.

**Visualization:** Hong Truong Luu, Chia-Lun Hsieh, Chia-Rong Chuang, Cheng-Wei Chen, Ngoc Toan Tran, Ngoc Long Vu, Kuo-Fang Chung.

**Writing – original draft:** Chia-Lun Hsieh, Kuo-Fang Chung.

**Writing – review & editing:** Hong Truong Luu, Chia-Lun Hsieh, Chia-Rong Chuang, Cheng-Wei Chen, Ngoc Toan Tran, Ngoc Long Vu, Kuo-Fang Chung.

## References

1. Gray S, Aminpour P, Reza C, Scyphers S, Grabowski J, Murphy R, et al. Harnessing the collective intelligence of stakeholders for conservation. *Front Ecol Environ*. 2020; 18(8):465–72. <https://doi.org/10.1002/fee.2232>
2. Reyes RP, Firm J, Nicol S, Chadès I, Stratford DS, Martin TG, et al. Building a stakeholder-led common vision increases the expected cost-effectiveness of biodiversity conservation. *PLoS ONE*. 2019; 14(6):e0218093. <https://doi.org/10.1371/journal.pone.0218093> PMID: 31194779
3. Gurney GG, Darling ES, Ahmadi GN, Agostini VN, Ban NC, Blythe J, et al. Biodiversity needs every tool in the box: use OECMs Comment. *Nature*. 2021; 595(7869):646–9. <https://doi.org/10.1038/d41586-021-02041-4> PMID: 34312552
4. Barraclough AD, Reed MG, Måren IE, Price MF, Moreira-Muñoz A, Coetzer K. Recognize 727 UNESCO Biosphere Reserves for biodiversity COP15. *Nature*. 2021; 598(7880):257. <https://doi.org/10.1038/d41586-021-02750-w> PMID: 34642476
5. UNESCO. Biosphere Reserves 2021. [cited 20 October 2022]. Available from: <https://en.unesco.org/biosphere>
6. CBD Secretariat. Kunming-Montreal Global biodiversity framework: CBD/COP/15/L.25; 2022.
7. Aschenbrand E, Michler T. Why do UNESCO biosphere reserves get less recognition than national parks? A landscape research perspective on protected area narratives in Germany. *Sustainability*. 2021; 13(24):e13647. <https://doi.org/10.3390/su132413647>
8. Myers N, Mittermeier RA, Mittermeier CG, da Fonseca GAB, Kent J. Biodiversity hotspots for conservation priorities. *Nature*. 2000; 403(6772):853–8. <https://doi.org/10.1038/35002501> PMID: 10706275
9. Sterling EJ, Hurley MM, Minh LD. Vietnam: a natural history. New Haven and London: Yale University Press; 2006.
10. Nguyen VH, Dang TTT, Nguyen HN. Management of biosphere reserves in Vietnam: status and challenges. *VNU J Sci Policy Manag Stud*. 2021; 37(2):81–92. <https://doi.org/10.25073/2588-1116/vnupam.4253>
11. Cuong CV, Dart P, Nguyen MH, Vo TML, Hockings M. Biosphere reserves in Vietnam. In: Reed MG, Price MF, editors. *UNESCO Biosphere Reserves*. London: Routledge; 2019. p. 201–12.

12. Cuong CV, Dart P, Dudley N, Hockings M. Factors influencing successful implementation of Biosphere Reserves in Vietnam: Challenges, opportunities and lessons learnt. *Environ Sci Policy*. 2017; 67:16–26. <https://doi.org/10.1016/j.envsci.2016.10.002>
13. Panitsa M, Iliopoulou N, Petrakis E. Citizen science, plant species, and communities' diversity and conservation on a Mediterranean biosphere reserve. *Sustainability*. 2021; 13(17):e9925. <https://doi.org/10.3390/su13179925>
14. UNESCO. Langbiang Biosphere Reserve, Viet Nam 2021. [cited 20 October 2022]. Available from: <https://en.unesco.org/biosphere/aspac/langbiang>
15. Nguyen ST, O'Shea TJ, Gore JA, Nguyen KV, Hoang TT, Motokawa M, et al. Bats (Chiroptera) of Bidoup Nui Ba National Park, Dalat Plateau, Vietnam. *Mamm Study*. 2021; 46(1):53–68. <https://doi.org/10.3106/ms2020-0024>
16. Hoang HD, Pham HM, Durand JD, Tran NT, Phan PD. Mahseers genera *Tor* and *Neolissochilus* (Teleostei: Cyprinidae) from southern Vietnam. *Zootaxa*. 2015; 4006(3):551–68. <https://doi.org/10.11646/zootaxa.4006.3.8> PMID: 26623783
17. Hoang HD, Pham HM, Tran NT. Two new species of shovel-jaw carp *Onychostoma* (Teleostei: Cyprinidae) from southern Vietnam. *Zootaxa*. 2015; 3962(1):123–38. <https://doi.org/10.11646/zootaxa.3962.1.6> PMID: 26249380
18. Nguyen HN, Tran BV, Nguyen LH, Neang T, Yushchenko PV, Poyarkov NA. A new species of *Oligodon* Fitzinger, 1826 from the Langbian Plateau, southern Vietnam, with additional information on *Oligodon annamensis* Leviton, 1953 (Squamata: Colubridae). *PeerJ*. 2020; 8:e8332. <https://doi.org/10.7717/peerj.8332> PMID: 31934510
19. Malhotra A, Thorpe RS, Mrinalini, Stuart BL. Two new species of pitviper of the genus *Cryptelytrops* Cope 1860 (Squamata: Viperidae: Crotalinae) from Southeast Asia. *Zootaxa*. 2011; (2757):1–23. <https://doi.org/10.11646/zootaxa.2757.1.1>
20. Poyarkov NA, Nguyen TV, Orlov NL, Vogel G. A new species of the genus *Calamaria* Boie, 1927 from the highlands of the Langbian Plateau, southern Vietnam (Squamata: Colubridae). *Russ J Herpetol*. 2019; 26(6):335–48. <https://doi.org/10.30906/1026-2296-2019-26-6-335-348>
21. Poyarkov NA, Duong TV, Orlov NL, Gogoleva SS, Vassilieva AB, Nguyen LT, et al. Molecular, morphological and acoustic assessment of the genus *Ophryophryne* (Anura, Megophryidae) from Langbian Plateau, southern Vietnam, with description of a new species. *ZooKeys*. 2017; 672:49–120. <https://doi.org/10.3897/zookeys.672.10624> PMID: 28769667
22. Rowley JLL, Le TTD, Tran TAD, Stuart BL, Hoang DH. A new tree frog of the genus *Rhacophorus* (Anura: Rhacophoridae) from southern Vietnam. *Zootaxa*. 2010; 2727:45–55. <https://doi.org/10.11646/zootaxa.2727.1.4>
23. Poyarkov NA, Nguyen TV, Yang JH, Gorin VA. A new species of *Micryletta* (Amphibia: Anura: Microhylidae) from the Langbian Plateau in southern Vietnam. *Zool Res*. 2021; 42(6):726–33. <https://doi.org/10.24272/j.issn.2095-8137.2021.228> PMID: 34636191
24. Hoang V, Luong MA, Nguyen QU, Orlov NL, Chen YH, Wang B, et al. A new species of *Microhyla* (Amphibia: Anura: Microhylidae) from Langbian Plateau, central Vietnam. *Asian Herpetol Res*. 2020; 11(3):161–82. <https://doi.org/10.16373/j.cnki.ahr.190060>
25. Rowley JLL, Tran DTA, Frankham GJ, Dekker AH, Le DTT, Truong QN, et al. Undiagnosed cryptic diversity in small, microendemic frogs (Leptolalax) from the Central Highlands of Vietnam. *PLoS ONE*. 2015; 10(5):e0128382. <https://doi.org/10.1371/journal.pone.0128382> PMID: 26020250
26. Lao TD, Le TAH, Truong NB. Morphological and genetic characteristics of the novel entomopathogenic fungus *Ophiocordyceps langbianensis* (Ophiocordycipitaceae, Hypocreales) from Lang Biang Biosphere Reserve, Vietnam. *Sci Rep*. 2021; 11(1):e1412. <https://doi.org/10.1038/s41598-020-78265-7> PMID: 33446667
27. Vu TL, Trinh VH, Trinh HL, Nguyen TBT, Dinh MH, Truong BN, et al. Discovery of entomopathogenic fungi *Cordyceps takaomontana* at Langbian Mountain, Lam Dong, Vietnam. *Ho Chi Minh City Open Univ J Sci*. 2015; 5:14–20.
28. Tran HD, Luu HT, Nguyen QD, Nguyen HC, Athen P, Wong KM. Identification, sexual dimorphism and aspects of the natural history of *Sapria himalayana* (Rafflesiaceae) on Vietnam's Lang Biang Plateau. *Bot Stud*. 2018; 59:e29. <https://doi.org/10.1186/s40529-018-0243-9> PMID: 30535726
29. Chen C-W, Kuo L-Y, Huang Y-H, Hsu T-C, Dang MT, Luu HT, et al. A new species and a new record of *Stegnogramma* (Thelypteridaceae; Polypodiales) from southern Vietnam. *Syst Bot*. 2019; 44(4):768–74. <https://doi.org/10.1600/036364419x15710776741503>
30. Chen C-W, Hsu T-C, Chao Y-S, Lu P-F, Li C-W, Tram NKT, et al. A newly recorded genus and twelve newly recorded species of ferns for Vietnam from Lang Biang Plateau. *Phytotaxa*. 2020; 443(2):121–43. <https://doi.org/10.11646/phytotaxa.443.2.1>

31. Chen C-W, Dang MT, Luu HT, Kao T-T, Huang Y-M, Li C-W. *Antrophyum nambanense*, a new vittaroid fern (Pteridaceae; Polypodiales) from Vietnam. *Syst Bot.* 2020; 45(3):450–9. <https://doi.org/10.1600/036364420x15935294613419>
32. Chen C-W, Ebihara A, Cheng K-Y, Hsu T-C, Huang Y-M, Dang VD, et al. Studies of Vietnamese Pteridophyte Flora 1. *Syst Bot.* 2021; 46(3):573–81. <https://doi.org/10.1600/036364421x16312067913507>
33. Tagane S, Ngoc NV, Binh HT, Nagahama A, Zhang M, Cuong TQ, et al. Fifteen new species of angiosperms from Bidoup-Nui Ba National Park, Southern Highlands of Vietnam. *Acta Phytotax Geobot.* 2020; 71(3):201–29. <https://doi.org/10.18942/apg.202002>
34. Komada N, Tagane S, Matsuo A, Ngoc NV, Binh HT, Nagahama A, et al. *Beilschmiedia bidoupensis* (Lauraceae), a new species from Bidoup-Nui Ba National Park, southern highland of Vietnam. *Phytotaxa.* 2022; 559(3):285–92. <https://doi.org/10.11646/phytotaxa.559.3.6>
35. Hsu T-C, Chen C-W, Hung HC, Tram NKT, Truong QC, Luu HT, et al. New and noteworthy orchids (Orchidaceae) discovered in Langbiang Plateau, southern Vietnam 1. *Taiwania.* 2020; 65(2):237–48. <https://doi.org/10.6165/tai.2020.65.237>
36. Pham PD, Averyanov LV, Dang V, Nguyen DH, Maisak T, Truong QT, et al. A new species and new record of *Bulbophyllum* (Orchidaceae) from Vietnam. *Phytotaxa.* 2021; 522(1):68–72. <https://doi.org/10.11646/phytotaxa.522.1.8>
37. Tien CV, Xia NH, Wong KM, Van DN, Toan PNH, Nguyen HN, et al. *Schizostachyum langbianense*, a new species of bamboo (Poaceae: Bambusoideae) from Lang Bian Mountain, Vietnam. *Phytotaxa.* 2016; 257(2):181–6. <https://doi.org/10.11646/phytotaxa.257.2.8>
38. Do TV, Xu B, Gao X-F. A new species and new records of *Flemingia* (Fabaceae) from Vietnam. *Ann Bot Fenn.* 2019; 56(1–3):41–8. <https://doi.org/10.5735/085.056.0108>
39. Van HT, Nguyen-Phi N, Luu HT. A new species of *Arisaema* (Araceae) from Vietnam. *Phytotaxa.* 2016; 277(1):90–4. <https://doi.org/10.11646/phytotaxa.277.1.9>
40. Chinh VT, Van DN, Tran VT, Xia N-H. *Stephania polygona* (Menispermaceae), a new species from Southern Vietnam. *Phytotaxa.* 2019; 400(3):211–4. <https://doi.org/10.11646/phytotaxa.400.3.8>
41. Ngoc NV, Dung LV, Tagane S, Binh HT, Son HT, Trung VQ, et al. *Lithocarpus dahuoaiensis* (Fagaceae), a new species from Lam Dong Province, Vietnam. *PhytoKeys.* 2016; 69:23–30. <https://doi.org/10.3897/phytokeys.69.9821> PMID: 27698581
42. Ngoc NV, Binh HT, Nagahama A, Tagane S, Toyama H, Matsuo A, et al. Morphological and molecular evidence reveals three new species of *Lithocarpus* (Fagaceae) from Bidoup—Nui Ba National Park, Vietnam. *PhytoKeys.* 2021; 186:73–92. <https://doi.org/10.3897/phytokeys.186.69878> PMID: 34975276
43. Nagahama A, Tagane S, Zhang M, Nguyen VN, Binh HT, Cuong TQ, et al. *Claoxylon langbiangense* (Euphorbiaceae), a new species from southern Vietnam. *Acta Phytotax Geobot.* 2021; 72(3):275–80. <https://doi.org/10.18942/apg.202016>
44. Lin C-W, Hsu T-C, Luu HT, Nguyen ILPT, Yang T-YA, Li C-W. Revision of *Begonia* (Begoniaceae) in Bidoup—Nui Ba National Park, Southern Vietnam, including two new species. *Phytotaxa.* 2021; 496(1):77–89. <https://doi.org/10.11646/phytotaxa.496.1.4>
45. Toyama H, Dang VS, Tagane S, Nguyen NV, Naiki A, Nagamasu H, et al. *Garcinia hopii* (Clusiaceae), a new species from Bidoup Nui Ba National Park, southern Vietnam. *PhytoKeys.* 2017; (77):63–70. <https://doi.org/10.3897/phytokeys.77.11575> PMID: 28814920
46. Orel G, Wilson PG, Truong LH. *Camellia curryana* and *C. longii* spp. nov. (Theaceae) from Vietnam. *Nord J Bot.* 2014; 32(1):42–50. <https://doi.org/10.1111/j.1756-1051.2013.00399.x>
47. Orel G, Wilson PG, Curry AS, Luu HT. Four new species and two new sections of *Camellia* (Theaceae) from Vietnam. *Novon.* 2014; 23(3):307–18. <https://doi.org/10.3417/2012076>
48. Dung LV, Son HT, Ninh T, Nhan PH. *Camellia quangcuongii* (Theaceae), a new species from Vietnam. *J Jpn Bot.* 2016; 91(4):226–30.
49. Le VS, Curry AS, Truong QC, Luong V, Nguyen TL. *Camellia flosculora*: a new species of *Camellia* section *Thea* series *Sinenses* (Theaceae) from Vietnam. *Brittonia.* 2021; 73(2):220–8. <https://doi.org/10.1007/s12228-020-09646-5>
50. Truong QC, Le VH, LV S., Le QM, Hoang G, Luu HT. *Camellia sphamii* (Theaceae, sect. *Piquetia*), a new taxon of yellow flower from Langbiang Biosphere Reserve, Vietnam. *Dalat Univ J Sci.* 2022; 12(3):10–7. [https://doi.org/10.37569/DalatUniversity.12.3.947\(2022\)](https://doi.org/10.37569/DalatUniversity.12.3.947(2022))
51. Loc PK, Chantaranonthai P, Hoi QV, Nguyen HT. *Mastixia langbianensis* (Nyssaceae), a new species from Vietnam. *Trop Nat Hist.* 2020; 20(3):228–34.
52. Duy N, Trieu LN, Chinh ND, Tran VT. A new variety of *Panax* (Araliaceae) from Lam Vien Plateau, Vietnam and its molecular evidence. *Phytotaxa.* 2016; 277(1):47–58. <https://doi.org/10.11646/phytotaxa.277.1.4>



53. Tagane S, Dang VS, Ngoc NV, Binh HT, Komada N, Wai JS, et al. *Macrosolen bidouensis* (Loranthaceae), a new species from Bidoup Nui Ba National Park, southern Vietnam. *PhytoKeys*. 2017; 80:113–20. <https://doi.org/10.3897/phytokeys.80.13338> PMID: 28781562
54. Dang VS, Tagane S, Hoang NS, Toyama H, Naiki A. *Lasianthus bidouensis* (Rubiaceae), a new species from southern Vietnam. *Ann Bot Fenn*. 2019; 56(1–3):191–5. <https://doi.org/10.5735/085.056.0123>
55. Luu HT, Pham HN, Tran G, Ngo TTD, Dinh NL, Ton TM. *Billolivia kyi* (Gesneriaceae), a new species from Vietnam. *Ann Bot Fennici*. 2015; 52:362–4. <https://doi.org/10.5735/085.052.0515>
56. Luu HT, Nhan PH, Dat NQ, Nguyen TV, Nguyen TM, Vu NL. Two new species of *Billolivia* (Gesneriaceae) from the Langbiang Plateau, Vietnam. *Phytotaxa*. 2018; 385(1):37–42. <https://doi.org/10.11646/phytotaxa.385.1.5>
57. Middleton DJ, Atkins H. A new species of *Aeschynanthus* (Gesneriaceae) from Vietnam. *Edinburgh J Bot*. 2019; 76(1):29–32. <https://doi.org/10.1017/S0960428618000252>
58. Vu NL, Nguyen TQT, Tran G, Nguyen QD, Luu HT. *Primulina scutellifolia*, a new species of Gesneriaceae from southern Vietnam. *PhytoKeys*. 2021; 187:15–21. <https://doi.org/10.3897/phytokeys.187.77856> PMID: 35002364
59. Cuong NH, Cuong NV, Tien NNM. Modeling land-use changes using logistic regression in Western Highlands of Vietnam: A case study of Lam Dong province. *Agr Nat Resour*. 56:935–44. <https://doi.org/10.34044/j.anres.2022.56.5.08>
60. QGIS Development Team. QGIS Geographic Information System. Open Source Geospatial Foundation Project 2023. [cited 20 October 2022]. Available from: <http://qgis.osgeo.org>.
61. WHYMAP. World Karst Aquifer Map. [cited 20 October 2022]. Available from: [https://www.whymap.org/whymap/EN/Maps\\_Data/Wokam/wokam\\_node\\_en.html](https://www.whymap.org/whymap/EN/Maps_Data/Wokam/wokam_node_en.html)
62. GBIF.org. GBIF Occurrence Download: *Primulina* Hance. 2022. <https://doi.org/10.15468/dl.r2jtue>
63. Weber A, Middleton DJ, Clark JL, Möller M. Keys to the infrafamilial taxa and genera of Gesneriaceae. *Rheede*. 2020; 30(1):5–47. <https://doi.org/10.22244/rheede.2020.30.01.02>
64. Xu W-B, Chang H, Huang J, Chung K-F. Molecular systematics of Chiritopsis-like *Primulina* (Gesneriaceae): one new species, one new name, two new combinations, and new synonyms. *Bot Stud*. 2019; 60:e18. <https://doi.org/10.1186/s40529-019-0266-x> PMID: 31468230
65. Wen F, Xin Z-B, Hong X, Cai L, Chen X-Y, Liang J-J, et al. *Actinostephanus* (Gesneriaceae), a new genus and species from Guangdong, South China. *PhytoKeys*. 2022; 193:89–106. <https://doi.org/10.3897/phytokeys.193.80715> PMID: 36760839
66. Wen F, Xin Z-B, Fu L-F, Li S, Su L-Y, Maciejewski S, et al. *Michaelmoelleria* (Gesneriaceae), a new lithophilous dwelling genus and species with zigzag corolla tube from southern Vietnam. *PhytoKeys*. 2020; (146):89–107. <https://doi.org/10.3897/phytokeys.146.49731> PMID: 32440254
67. Vu NL, Pham HN, Nguyen TV, Luu HT. *Billolivia tichii* (Gesneriaceae), a new species from Vietnam. *Phytotaxa*. 2015; 219(2):190–4. <https://doi.org/10.11646/phytotaxa.219.2.9>
68. Chen W-H, Middleton DJ, Nguyen HQ, Nguyen HT, Averyanov LV, Chen R-Z, et al. Two new species of *Oreocharis* (Gesneriaceae) from Northwest Vietnam. *Gard Bull Singapore*. 2017; 69(2):295–305. [https://doi.org/10.26492/gbs69\(2\).2017-08](https://doi.org/10.26492/gbs69(2).2017-08)
69. Lý N-S. A new species of *Billolivia* (Gesneriaceae) from Central Vietnam. *Phytotaxa*. 2017; 29(1):89–93. <https://doi.org/10.11646/phytotaxa.291.1.9>
70. Chen WH, Nguyen QH, Chen RZ, Nguyen TH, Nguyen SK, Nguyen VT, et al. Two new species of *Oreocharis* (Gesneriaceae) from Fan Si Pan, the highest mountain in Vietnam. *PhytoKeys*. 2018; 94:95–106. <https://doi.org/10.3897/phytokeys.94.21329> PMID: 29416424
71. Hong X, Li Z-L, Maciejewski S, Wen F, Do TV. *Didymocarpus puhoatensis* (Gesneriaceae), a new species from Vietnam. *PhytoKeys*. 2018; 94:87–93. <https://doi.org/10.3897/phytokeys.94.21650> PMID: 29416423
72. Jong K, Burt BL. The evolution of morphological novelty exemplified in the growth patterns of some Gesneriaceae. *New Phytol*. 1975; 75(2):297–311. <https://doi.org/10.1111/j.1469-8137.1975.tb01400.x>
73. Clark JL, Funke MM, Duffy AM, Smith JF. Phylogeny of a neotropical clade in the Gesneriaceae: More tales of convergent evolution. *Int J Plant Sci*. 2012; 173(8):894–916. <https://doi.org/10.1086/667229>
74. Möller M, Middleton D, Nishii K, Wei Y-G, Sontag S, Weber A. A new delineation for *Oreocharis* incorporating an additional ten genera of Chinese Gesneriaceae. *Phytotaxa*. 2011; 23:1–36. <https://doi.org/10.11646/PHYTOTAXA.23.1.1>
75. Weber A, Middleton DJ, Forrest A, Kiew R, Lim C-L, Rafidah AR, et al. Molecular systematics and remodelling of *Chirita* and associated genera (Gesneriaceae). *Taxon*. 2011; 60(3):767–90. <https://doi.org/10.1002/tax.603012>

76. Weber A, Wei Y-G, Puglisi C, Wen F, Mayer V, Möller M. A new definition of the genus *Petrocodon* (Gesneriaceae). *Phytotaxa*. 2011; 23(1):49–67. <https://doi.org/10.11646/PHYTOTAXA.23.1.3>
77. Weber A, Clark JL, Möller M. A new formal classification of Gesneriaceae. *Selbyana*. 2013; 31(2):68–94.
78. Wood D. A revision of *Chirita* (Gesneriaceae). *Notes Roy Bot Gard Edinburgh*. 1974; 33:123–205.
79. Möller M, Forrest A, Wei Y-G, Weber A. A molecular phylogenetic assessment of the advanced Asiatic and Malesian didymocarpoid Gesneriaceae with focus on non-monophyletic and monotypic genera. *Plant Syst Evol*. 2011; 292(3–4):223–48. <https://doi.org/10.1007/s00606-010-0413-z>
80. Wang Y-Z, Mao R-B, Liu Y, Li JM, Dong Y, Li Z-Y, et al. Phylogenetic reconstruction of *Chirita* and allies (Gesneriaceae) with taxonomic treatments. *J Syst Evol*. 2011; 49(1):50–64. <https://doi.org/10.1111/j.1759-6831.2010.00113.x>
81. GRC 2022. Gesneriaceae Resource Centre: Royal Botanic Garden Edinburgh; continuously updated. [cited 20 October 2022]. Available from: <https://padme.rbge.org.uk/GRC>
82. Xu W-B, Zhang Q, Wen F, Liao W-B, Pan B, Chang H, et al. Nine new combinations and one new name of *Primulina* (Gesneriaceae) from South China. *Phytotaxa*. 2012; 64:1–8. <https://doi.org/10.11646/PHYTOTAXA.64.1.1>
83. Möller M, Nishii K, Atkin HJ, Kong HH, Kang M, Wei YG, et al. An expansion of the genus *Deinostigma* (Gesneriaceae). *Gard Bull Singapore*. 2016; 68(1):145–72. <https://doi.org/10.3850/S2382581216000119>
84. Möller M, Bui HQ, Linh LTM, Atkin HJ, Middleton DJ. Additional morphological notes and molecular-phylogenetic support for the distinct status of *Deinostigma cicatricosa* and *D. minutihamata* (Gesneriaceae). *Rheedea*. 2020; 30(1):116–27. <https://doi.org/10.22244/rheedea.2020.30.01.05>
85. Li P-W, Smith JF, Maity D, Shi X-Z, Yang L-H. Reassessment of *Chirita umbrophila* (Gesneriaceae) based on molecular and morphological evidence. *Syst Bot*. 2022; 47(2):514–24. <https://doi.org/10.1600/036364422x16512572275016>
86. Middleton D, Atkins H, Luu HT, Nishii K, Möller M. *Billolivia*, a new genus of Gesneriaceae from Vietnam with five new species. *Phytotaxa*. 2014; 161(4):241–69. <https://doi.org/10.11646/phytotaxa.161.4.1>
87. Middleton DJ, Nishii K, Puglisi C, Forrest LL, Möller M. *Chayamaritia* (Gesneriaceae: Didymocarpoideae), a new genus from Southeast Asia. *Plant Syst Evol*. 2015; 301:1947–66. <https://doi.org/10.1007/s00606-015-1213-2>
88. Möller M, Chen W-H, Shui Y-M, Atkin H, Middleton DJ. A new genus of Gesneriaceae in China and the transfer of *Briggsia* species to other genera. *Gard Bull Singapore*. 2014; 66(2):195–205.
89. Puglisi C, Yao TL, Milne R, Möller M, Middleton DJ. Generic recircumscription in the Loxocarpaceae (Gesneriaceae), as inferred by phylogenetic and morphological data. *Taxon*. 2016; 65(2):277–92. <https://doi.org/10.12705/652.5>
90. Middleton DJ, Khew GS, Poopath M, Moller M, Puglisi C. *Rachunia cymbiformis*, a new genus and species of Gesneriaceae from Thailand. *Nord J Bot*. 2018; 36(11):e01992. <https://doi.org/10.1111/njb.01992>
91. Pellegrin F. Les Gesnéracées-Cyrtandrées d'Indo-Chine. *Bull Soc Bot France*. 1926; 73(3):412–29. <https://doi.org/10.1080/00378941.1926.10833599>
92. Pellegrin F. Gesnéracées. In: Lecomte H, editor. *Flore générale de L'Indo-chine*, vol 4. Paris: Masson; 1930. p. 487–565.
93. Pellegrin F. Cyrtandrées nouvelles d'Indo-Chine. *Bull Mus Natl Hist Nat*. 1931; 3(8):756–8.
94. Kong H-H, Condamine FL, Harris A-J, Chen J-L, Pan B, Möller M, et al. Both temperature fluctuations and East Asian monsoons have driven plant diversification in the karst ecosystems from southern China. *Mol Ecol*. 2017; 26(22):6414–29. <https://doi.org/10.1111/mec.14367> PMID: 28960701
95. Xu M-Z, Yang L-H, Kong H-H, Wen F, Kang M. Congruent spatial patterns of species richness and phylogenetic diversity in karst flora: Case study of *Primulina* (Gesneriaceae). *J Syst Evol*. 2021; 59(2):251–61. <https://doi.org/10.1111/jse.12558>
96. Hsieh C-L, Xu W-B, Chung K-F. Plastomes of limestone karst gesneriad genera *Petrocodon* and *Primulina*, and the comparative plastid phylogenomics of Gesneriaceae. *Sci Rep*. 2022; 12:e15800. <https://doi.org/10.1038/s41598-022-19812-2> PMID: 36138079
97. Hô PH. An illustrated flora of Vietnam, Vol. 3. Ho Chi Minh: Youth Publishing House; 2003.
98. Wang W-T, Li Z-Y. Genus novum Gesneriacearum e Vietnam. *Acta Phytotax Sin*. 1992; 30(4):356–61.
99. Le TA, Le NT, Dinh D, Tran MD, Wen F. *Deinostigma serratum*, a new species of Gesneriaceae from central Vietnam. *Taiwania*. 2022; 67(1):115–8. <https://doi.org/10.6165/tai.2022.67.115>

100. Doyle JJ, Doyle JL. A rapid DNA isolation procedure for small quantities of fresh leaf tissue. *Phytochem Bull.* 1987; 19(1):11–5.
101. Ogutcen E, Christe C, Nishii K, Salamin N, Möller M, Perret M. Phylogenomics of Gesneriaceae using targeted capture of nuclear genes. *Mol Phylogenet Evol.* 2021; 157:e107068. <https://doi.org/10.1016/j.ympev.2021.107068> PMID: 33422648
102. Middleton DJ, Iler M. *Tribounia*, a new genus of Gesneriaceae from Thailand. *Taxon.* 2012; 61(6):1286–95. <https://doi.org/10.1002/tax.616009>
103. Wei Y-G, Wen F, Chen W-H, Shui Y-M, Möller M. *Litostigma*, a new genus from China: a morphological link between basal and derived Didymocarpoideae Gesneriaceae. *Edinburgh J Bot.* 2010; 67(1):161–84. <https://doi.org/10.1017/S0960428609990291>
104. White TJ, Bruns T, Lee S, Talor J. Amplification and direct sequencing of fungal ribosomal RNA genes for phylogenetics. In: Innis MA, Gelfand DH, Sninsky JJ, White TJ, editors. *PCR Protocols: A Guide to Methods and Applications.* San Diego: Academic Press; 1990. p. 315–22.
105. Untergasser A, Cutcutache I, Koressaar T, Ye J, Faircloth BC, Remm M, et al. Primer3-new capabilities and interfaces. *Nucleic Acids Res.* 2012; 40(15):e115. <https://doi.org/10.1093/nar/gks596> PMID: 22730293
106. Kearse M, Moir R, Wilson A, Stones-Havas S, Cheung M, Sturrock S, et al. Geneious Basic: An integrated and extendable desktop software platform for the organization and analysis of sequence data. *Bioinformatics.* 2012; 28(12):1647–9. <https://doi.org/10.1093/bioinformatics/bts199> PMID: 22543367
107. Katoh K, Standley DM. MAFFT Multiple Sequence Alignment Software Version 7: Improvements in performance and usability. *Mol Biol Evol.* 2013; 30(4):772–80. <https://doi.org/10.1093/molbev/mst010> PMID: 23329690
108. Stamatakis A. RAxML version 8: a tool for phylogenetic analysis and post-analysis of large phylogenies. *Bioinformatics.* 2014; 30(9):1312–3. <https://doi.org/10.1093/bioinformatics/btu033> PMID: 24451623
109. Borowiec ML. AMAS: a fast tool for alignment manipulation and computing of summary statistics. *PeerJ.* 2016; 4:e1660. <https://doi.org/10.7717/peerj.1660> PMID: 26835189
110. Ronquist F, Teslenko M, van der Mark P, Ayres DL, Darling A, Höhna S, et al. MrBayes 3.2: Efficient Bayesian phylogenetic inference and model choice across a large model space. *Syst Biol.* 2012; 61(3):539–42. <https://doi.org/10.1093/sysbio/sys029> PMID: 22357727
111. Hodcroft E. TreeCollapseCL 4. [cited 20 October 2022]. Available from: <http://emmahodcroft.com/TreeCollapseCL.html>
112. Kalyaanamoorthy S, Minh BQ, Wong TKF, von Haeseler A, Jermiin LS. ModelFinder: fast model selection for accurate phylogenetic estimates. *Nat Methods.* 2017; 14(6):587–9. <https://doi.org/10.1038/nmeth.4285> PMID: 28481363
113. Minh BQ, Schmidt HA, Chernomor O, Schrempf D, Woodhams MD, von Haeseler A, et al. IQ-TREE 2: New models and efficient methods for phylogenetic inference in the genomic era. *Mol Biol Evol.* 2020; 37(5):1530–11534. <https://doi.org/10.1093/molbev/msaa015> PMID: 32011700
114. Rambaut A. FigTree v. 1.4.4 2006–2018. [cited 20 October 2022]. Available from: <http://tree.bio.ed.ac.uk/software/figtree/>
